# Supplementary material
Source: PubMed Central journal article supplement (PMC3385824)
Supplement: 12248_2012_9363_MOESM1_ESM.pdf [file 12248_2012_9363_MOESM1_ESM.pdf]

## I. Chemical reactions

The relevant chemical reactions are presented here (molecular species and parameters are defined in the glossary):

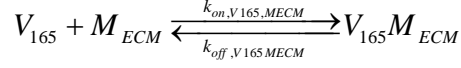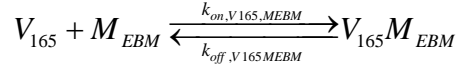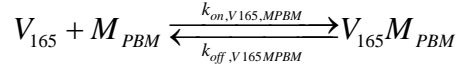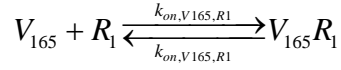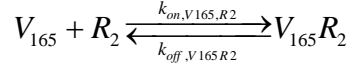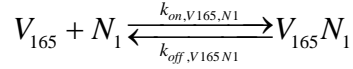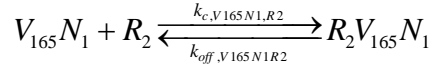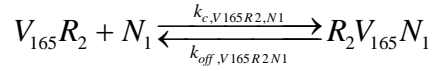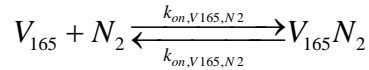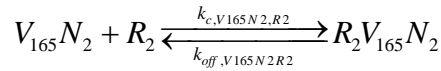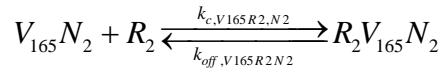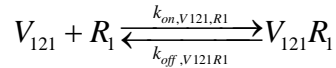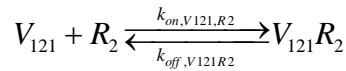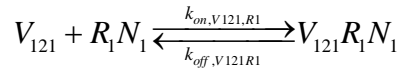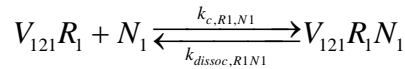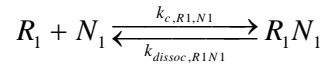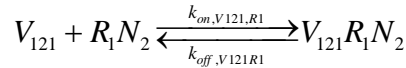

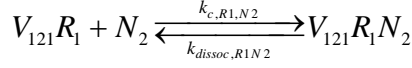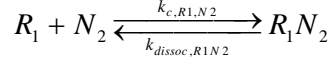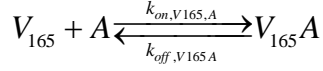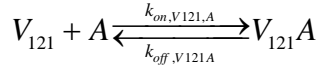

## II. Equations

The complete list of ordinary differential equations is presented below:

### A. Interstitial space in normal tissue compartment

$$\begin{aligned} \frac{d[V_{165}]_N}{dt} = & q_{V165}^N - k_{on,V165,MEBM}^N [V_{165}]_N [M_{EBM}]_N + k_{off,V165,MEBM}^N [V_{165}M_{EBM}]_N \\ & - k_{on,V165,MPBM}^N [V_{165}]_N [M_{PBM}]_N + k_{off,V165,MPBM}^N [V_{165}M_{PBM}]_N \\ & - k_{on,V165,MECM}^N [V_{165}]_N [M_{ECM}]_N + k_{off,V165,MECM}^N [V_{165}M_{ECM}]_N \\ & - k_{on,V165,R1}^N [V_{165}]_N [R_1]_N + k_{off,V165R1}^N [V_{165}R_1]_N \\ & - k_{on,V165,R2}^N [V_{165}]_N [R_2]_N + k_{off,V165R2}^N [V_{165}R_2]_N \\ & - k_{on,V165,N1}^N [V_{165}]_N [N_1]_N + k_{off,V164N1}^N [V_{165}N_1]_N \\ & - k_{on,V165,N1}^{N,myo} [V_{165}]_N [N_1]_{N,myo} + k_{off,V164N1}^{N,myo} [V_{165}N_1]_{N,myo} \\ & - k_{on,V165,A}^N [V_{165}]_N [A]_N + k_{off,V164A}^N [V_{165}A]_N \\ & - \left( \frac{k_L + k_{pV}^{NB} S_{NB}}{U_N} \right) \frac{[V_{165}]_N}{K_{AV,N}} + k_{pV}^{BN} \frac{S_{NB}}{U_N} \frac{U_B}{U_P} [V_{165}]_B \end{aligned} \quad (S.1)$$

$$\begin{aligned} \frac{d[V_{121}]_N}{dt} = & q_{V121}^N - k_{on,V121,R1}^N [V_{121}]_N [R_1]_N + k_{off,V121R1}^N [V_{121}R_1]_N \\ & - k_{on,V121,R1N1}^N [V_{121}]_N [R_1N_1]_N + k_{off,V121R1N1}^N [V_{121}R_1N_1]_N \\ & - k_{on,V121,R2}^N [V_{121}]_N [R_2]_N + k_{off,V121R2}^N [V_{121}R_2]_N \\ & - k_{on,V121,A}^N [V_{121}]_N [A]_N + k_{off,V121A}^N [V_{121}A]_N \\ & - \left( \frac{k_L + k_{pV}^{NB} S_{NB}}{U_N} \right) \frac{[V_{121}]_N}{K_{AV,N}} + k_{pV}^{BN} \frac{S_{NB}}{U_N} \frac{U_B}{U_P} [V_{121}]_B \end{aligned} \quad (S.2)$$

$$\frac{d[M_{EBM}]_N}{dt} = -k_{on,V165,MEBM}^N [V_{165}]_N [M_{EBM}]_N + k_{off,V165MEBM}^N [V_{165}M_{EBM}]_N \quad (S.3)$$

$$\frac{d[M_{PBM}]_N}{dt} = -k_{on,V165,MPBM}^N [V_{165}]_N [M_{PBM}]_N + k_{off,V165MPBM}^N [V_{165}M_{PBM}]_N \quad (S.4)$$

$$\frac{d[M_{ECM}]_N}{dt} = -k_{on,V165,MECM}^N [V_{165}]_N [M_{ECM}]_N + k_{off,V165MECM}^N [V_{165}M_{ECM}]_N \quad (S.5)$$

$$\frac{d[V_{165}M_{EBM}]_N}{dt} = k_{on,V165,MEBM}^N [V_{165}]_N [M_{EBM}]_N - k_{off,V165MEBM}^N [V_{165}M_{EBM}]_N \quad (S.6)$$

$$\frac{d[V_{165}M_{PBM}]_N}{dt} = k_{on,V165,MPBM}^N [V_{165}]_N [M_{PBM}]_N - k_{off,V165MPBM}^N [V_{165}M_{PBM}]_N \quad (S.7)$$

$$\frac{d[V_{165}M_{ECM}]_N}{dt} = k_{on,V165,MECM}^N [V_{165}]_N [M_{ECM}]_N - k_{off,V165MECM}^N [V_{165}M_{ECM}]_N \quad (S.8)$$

$$\begin{aligned} \frac{d[R_1]_N}{dt} = & s_{R1}^N - k_{int,R1}^N [R_1]_N - k_{on,V165,R1}^N [V_{165}]_N [R_1]_N + k_{off,V165R1}^N [V_{165}R_1]_N \\ & - k_{on,V121,R1}^N [V_{121}]_N [R_1]_N + k_{off,V121R1}^N [V_{121}R_1]_N \\ & - k_{c,R1,N1}^N [N_1]_N [R_1]_N + k_{dissoc,R1N1}^N [R_1N_1]_N \end{aligned} \quad (S.9)$$

$$\begin{aligned} \frac{d[R_2]_N}{dt} = & s_{R2}^N - k_{int,R2}^N [R_2]_N - k_{on,V121,R2}^N [V_{121}]_N [R_2]_N + k_{off,V120R2}^N [V_{121}R_2]_N \\ & - k_{on,V1645R2}^N [V_{165}]_N [R_2]_N + k_{off,V165R2}^N [V_{165}R_2]_N \\ & - k_{c,V165N1,R2}^N [V_{165}N_1]_N [R_2]_N + k_{off,V165N1,R2}^N [R_2V_{165}N_1]_N \end{aligned} \quad (S.10)$$

$$\begin{aligned} \frac{d[N_1]_N}{dt} = & s_{N1}^N - k_{int,N1}^N [N_1]_N - k_{c,V121R1,N1}^N [V_{121}R_1]_N [N_1]_N + k_{dissoc,R1N1}^N [V_{121}R_1N_1]_N \\ & - k_{c,R1,N1}^N [N_1]_N [R_1]_N + k_{dissoc,R1N1}^N [R_1N_1]_N \\ & - k_{on,V165,N1}^N [V_{165}]_N [N_1]_N + k_{off,V165N1}^N [V_{165}N_1]_N \\ & - k_{c,V165R2,N1}^N [V_{165}R_2]_N [N_1]_N + k_{off,V165R2,N1}^N [R_2V_{165}N_1]_N \end{aligned} \quad (S.11)$$

$$\begin{aligned} \frac{d[N_1]_{N,myo}}{dt} = & s_{N1}^{N,myo} - k_{int,N1}^{N,myo} [N_1]_{N,myo} \\ & + k_{on,V165,N1}^{N,myo} [V_{165}]_N [N_1]_{N,myo} - k_{off,V165N1}^{N,myo} [V_{165}N_1]_{N,myo} \end{aligned} \quad (S.12)$$

$$\frac{d[V_{165}R_1]_N}{dt} = -k_{int,V165R1}^N[V_{164}R_1]_N + k_{on,V165,R1}^N[V_{165}]_N[R_1]_N - k_{off,V165R1}^N[V_{165}R_1]_N \quad (S.13)$$

$$\begin{aligned} \frac{d[V_{165}R_2]_N}{dt} &= -k_{int,V165R2}^N[V_{165}R_2]_N + k_{on,V165,R2}^N[V_{165}]_N[R_2]_N - k_{off,V165R2}^N[V_{165}R_2]_N \\ &\quad - k_{c,V165R2,N1}^N[V_{165}R_2]_N[N_1]_N + k_{off,V165R2N1}^N[R_2V_{165}N_1]_N \end{aligned} \quad (S.14)$$

$$\begin{aligned} \frac{d[V_{165}N_1]_N}{dt} &= -k_{int,V165N1}^N[V_{165}N_1]_N + k_{on,V165,N1}^N[V_{165}]_N[N_1]_N - k_{off,V165N1}^N[V_{165}N_1]_N \\ &\quad - k_{c,V165N1,R2}^N[V_{165}N_1]_N[R_2]_N + k_{off,V165N1R2}^N[R_2V_{165}N_1]_N \end{aligned} \quad (S.15)$$

$$\begin{aligned} \frac{d[R_2V_{165}N_1]_N}{dt} &= -k_{int,V165R2N1}^N[R_2V_{165}N_1]_N \\ &\quad + k_{c,V165R2,N1}^N[V_{165}R_2]_N[N_1]_N - k_{off,V165R2N1}^N[R_2V_{165}N_1]_N \\ &\quad + k_{c,V165N1,R2}^N[V_{165}N_1]_N[R_2]_N - k_{off,V165N1R2}^N[R_2V_{165}N_1]_N \end{aligned} \quad (S.16)$$

$$\begin{aligned} \frac{d[V_{121}R_1]_N}{dt} &= -k_{int,V121R1}^N[V_{121}R_1]_N \\ &\quad + k_{on,V121,R1}^N[V_{121}]_N[R_1]_N - k_{off,V121R1}^N[V_{121}R_1]_N \\ &\quad - k_{c,R1,N1}^N[V_{121}R_1]_N[N_1]_N + k_{dissoc,R1N1}^N[V_{121}R_1N_1]_N \end{aligned} \quad (S.17)$$

$$\frac{d[V_{121}R_2]_N}{dt} = -k_{int,V121R2}^N[V_{121}R_2]_N + k_{on,V121,R2}^N[V_{121}]_N[R_2]_N - k_{off,V121R2}^N[V_{121}R_2]_N \quad (S.18)$$

$$\begin{aligned} \frac{d[R_1N_1]_N}{dt} &= -k_{int,R1N1}^N[R_1N_1]_N \\ &\quad + k_{c,R1,N1}^N[R_1]_N[N_1]_N - k_{dissoc,R1N1}^N[R_1N_1]_N \\ &\quad - k_{on,V121,R1}^N[V_{121}]_N[R_1N_1]_N + k_{off,V121R1}^N[V_{121}R_1N_1]_N \end{aligned} \quad (S.19)$$

$$\begin{aligned} \frac{d[V_{121}R_1N_1]_N}{dt} &= -k_{int,V121R1N1}^N[V_{121}R_1N_1]_N \\ &\quad + k_{c,V121R1,N1}^N[V_{121}R_1]_N[N_1]_N - k_{dissoc,V121N1}^N[V_{121}R_1N_1]_N \\ &\quad + k_{on,V121R1N1}^N[V_{121}]_N[R_1N_1]_N - k_{off,V121R1N1}^N[V_{121}R_1N_1]_N \end{aligned} \quad (S.20)$$

$$\begin{aligned} \frac{d[V_{165}N_1]_{N,myo}}{dt} &= -k_{int,V165N1}^{N,myo}[V_{165}N_1]_{N,myo} \\ &\quad + k_{on,V165,N1}^{N,myo}[V_{165}]_{N,myo}[N_1]_{N,myo} - k_{off,V165N1}^{N,myo}[V_{165}N_1]_{N,myo} \end{aligned} \quad (S.21)$$

$$\begin{aligned}
\frac{d[A]_N}{dt} = & -k_{on,V165,A}^N [V_{165}]_N [A]_N + k_{off,V165A}^N [V_{165}A]_N \\
& -k_{on,V121,A}^N [V_{121}]_N [A]_N + k_{off,V121A}^N [V_{121}A]_N \\
& + k_{pA}^{BN} \frac{S_{NB}}{U_N} \frac{U_B}{U_P} [A]_B - \left( \frac{k_L + k_{pA}^{NB} S_{NB}}{U_N} \right) \frac{[A]_N}{K_{AV,N}}
\end{aligned} \tag{S.22}$$

$$\begin{aligned}
\frac{d[V_{165}A]_N}{dt} = & k_{on,V165,A}^N [V_{165}]_N [A]_N - k_{off,V165A}^N [V_{165}A]_N \\
& + k_{pA}^{BN} \frac{S_{NB}}{U_N} \frac{U_B}{U_P} [V_{165}A]_B - \left( \frac{k_L + k_{pA}^{NB} S_{NB}}{U_N} \right) \frac{[V_{165}A]_N}{K_{AV,N}}
\end{aligned} \tag{S.23}$$

$$\begin{aligned}
\frac{d[V_{121}A]_N}{dt} = & k_{on,V121,A}^N [V_{121}]_N [A]_N - k_{off,V121A}^N [V_{121}A]_N \\
& + k_{pA}^{BN} \frac{S_{NB}}{U_N} \frac{U_B}{U_P} [V_{121}A]_B - \left( \frac{k_L + k_{pA}^{NB} S_{NB}}{U_N} \right) \frac{[V_{121}A]_N}{K_{AV,N}}
\end{aligned} \tag{S.24}$$

## B. Interstitial space in blood compartment

We denote the luminal receptors and ligand-receptor complexes on endothelial cells (ECs) by the subscript  $i$  ( $i=N$  for normal ECs;  $i=T$  for diseased ECs).

$$\begin{aligned}
\frac{d[V_{165}]_B}{dt} = & -c_{V165} [V_{165}]_B - k_{on,V165,R1}^B [V_{165}]_B [R_1]_{B,i} + k_{off,V165R1}^B [V_{165}R_1]_{B,i} \\
& -k_{on,V165,R2}^B [V_{165}]_B [R_2]_{B,i} + k_{off,V165R2}^B [V_{165}R_2]_{B,i} \\
& -k_{on,V165,N1}^B [V_{165}]_B [N_1]_{B,i} + k_{off,V165N1}^B [V_{165}N_1]_{B,i} \\
& -k_{on,V165,A}^B [V_{165}]_B [A]_B + k_{off,V165A}^B [V_{165}A]_B \\
& - \frac{k_{pV}^{BN} S_{NB}}{U_P} [V_{165}]_B + \left( \frac{k_L + k_{pV}^{NB} S_{NB}}{U_B} \right) \frac{[V_{165}]_N}{K_{AV,N}}
\end{aligned} \tag{S.25}$$

$$\begin{aligned}
\frac{d[V_{121}]_B}{dt} = & -c_{V121}[V_{121}]_B - k_{on,V121,R1}^B [V_{121}]_B [R_1]_{B,i} + k_{off,V121R1}^B [V_{121}R_1]_{B,i} \\
& - k_{on,V121,R1N1}^B [V_{121}]_B [R_1N_1]_{B,i} + k_{off,V121R1N1}^B [V_{121}R_1N_1]_{B,i} \\
& - k_{on,V121,R2}^B [V_{121}]_B [R_2]_{B,i} + k_{off,V121R2}^B [V_{121}R_2]_{B,i} \\
& - k_{on,V121,A}^B [V_{121}]_B [A]_B + k_{off,V121A}^B [V_{121}A]_B \\
& - \frac{k_{pV}^{BN} S_{NB}}{U_p} [V_{121}]_B + \left( \frac{k_L + k_{pV}^{NB} S_{NB}}{U_B} \right) \frac{[V_{121}]_N}{K_{AV,N}}
\end{aligned} \tag{S.26}$$

$$\begin{aligned}
\frac{d[R_1]_{B,i}}{dt} = & s_{R1}^B - k_{int,R1}^B [R_1]_{B,i} - k_{on,V165,R1}^B [V_{164}]_B [R_1]_{B,i} + k_{off,V165R1}^B [V_{165}R_1]_{B,i} \\
& - k_{on,V121,R1}^B [V_{121}]_B [R_1]_{B,i} + k_{off,V121R1}^B [V_{121}R_1]_{B,i} \\
& - k_{c,R1,N1}^B [N_1]_{B,i} [R_1]_{B,i} + k_{dissoc,R1N1}^B [R_1N_1]_{B,i}
\end{aligned} \tag{S.27, S.28}$$

$$\begin{aligned}
\frac{d[R_2]_{B,i}}{dt} = & s_{R2}^B - k_{int,R2}^B [R_2]_{B,i} - k_{on,V121,R2}^B [V_{121}]_B [R_2]_{B,i} + k_{off,V121R2}^B [V_{121}R_2]_{B,i} \\
& - k_{on,V165,R2}^B [V_{165}]_B [R_2]_{B,i} + k_{off,V165R2}^B [V_{165}R_2]_{B,i} \\
& - k_{c,V165N1,R2}^B [V_{165}N_1]_B [R_2]_{B,i} + k_{off,V165N1,R2}^B [R_2V_{165}N_1]_{B,i}
\end{aligned} \tag{S.29, S.30}$$

$$\begin{aligned}
\frac{d[N_1]_{B,i}}{dt} = & s_{N1}^B - k_{int,N1}^B [N_1]_{B,i} - k_{c,V121R1,N1}^B [V_{121}R_1]_B [N_1]_{B,i} + k_{dissoc,R1N1}^B [V_{121}R_1N_1]_{B,i} \\
& - k_{c,R1,N1}^B [N_1]_{B,i} [R_1]_{B,i} + k_{dissoc,R1N1}^B [R_1N_1]_{B,i} \\
& - k_{on,V165,N1}^B [V_{165}]_B [N_1]_{B,i} + k_{off,V165N1}^B [V_{165}N_1]_{B,i} \\
& - k_{c,V165R2,N1}^B [V_{165}R_2]_{B,i} [N_1]_{B,i} + k_{off,V165R2,N1}^B [R_2V_{165}N_1]_{B,i}
\end{aligned} \tag{S.31, S.32}$$

$$\frac{d[V_{165}R_1]_{B,i}}{dt} = -k_{int,V165R1}^B [V_{165}R_1]_{B,i} + k_{on,V165,R1}^B [V_{165}]_B [R_1]_{B,i} - k_{off,V165R1}^B [V_{165}R_1]_{B,i} \tag{S.33, S.34}$$

$$\frac{d[V_{165}R_2]_{B,i}}{dt} = -k_{int,V165R2}^B [V_{165}R_2]_{B,i} + k_{on,V165,R2}^B [V_{165}]_B [R_2]_{B,i} - k_{off,V165R2}^B [V_{165}R_2]_{B,i} \tag{S.35, S.36}$$

$$\begin{aligned}
\frac{d[V_{165}N_1]_{B,i}}{dt} = & -k_{int,V165N1}^B [V_{165}N_1]_{B,i} + k_{on,V165,N1}^B [V_{165}]_B [N_1]_{B,i} - k_{off,V165N1}^B [V_{165}N_1]_{B,i} \\
& - k_{c,V165N1,R2}^B [V_{165}N_1]_{B,i} [R_2]_{B,i} + k_{off,V165N1R2}^B [R_2V_{165}N_1]_{B,i}
\end{aligned} \tag{S.37, S.38}$$

$$\begin{aligned}
\frac{d[R_2 V_{165} N_1]_{B,i}}{dt} &= -k_{int,V165R2N1}^B [R_2 V_{165} N_1]_{B,i} \\
&+ k_{c,V165R2,N1}^B [V_{165} R_2]_{B,i} [N_1]_{B,i} - k_{off,V165R2N1}^B [R_2 V_{165} N_1]_{B,i} \\
&+ k_{c,V165N1,R2}^B [V_{165} N_1]_{B,i} [R_2]_{B,i} - k_{off,V165N1R2}^B [R_2 V_{165} N_1]_{B,i}
\end{aligned} \tag{S.39, S.40}$$

$$\begin{aligned}
\frac{d[V_{121} R_1]_{B,i}}{dt} &= -k_{int,V121R1}^B [V_{121} R_1]_{B,i} \\
&+ k_{on,V121,R1}^B [V_{121}]_{B,i} [R_1]_{B,i} - k_{off,V121R1}^B [V_{121} R_1]_{B,i} \\
&- k_{c,R1,N1}^B [V_{121} R_1]_{B,i} [N_1]_{B,i} + k_{dissoc,R1N1}^B [V_{121} R_1 N_1]_{B,i}
\end{aligned} \tag{S.41, S.42}$$

$$\frac{d[V_{121} R_2]_{B,i}}{dt} = -k_{int,V121R2}^B [V_{121} R_2]_{B,i} + k_{on,V121,R2}^B [V_{121}]_B [R_2]_{B,i} - k_{off,V121R2}^B [V_{121} R_2]_{B,i} \tag{S.43, S.44}$$

$$\begin{aligned}
\frac{d[R_1 N_1]_{B,i}}{dt} &= -k_{int,R1N1}^B [R_1 N_1]_{B,i} \\
&+ k_{c,R1,N1}^B [R_1]_{B,i} [N_1]_{B,i} - k_{dissoc,R1N1}^B [R_1 N_1]_{B,i} \\
&- k_{on,V121,R1}^B [V_{121}]_B [R_1 N_1]_{B,i} + k_{off,V121R1}^B [V_{121} R_1 N_1]_{B,i}
\end{aligned} \tag{S.45, S.46}$$

$$\begin{aligned}
\frac{d[V_{121} R_1 N_1]_{B,i}}{dt} &= -k_{intV121R1N1}^B [V_{121} R_1 N_1]_{B,i} \\
&+ k_{c,V121R1,N1}^B [V_{121} R_1]_{B,i} [N_1]_{B,i} - k_{dissoc,V121N1}^B [V_{121} R_1 N_1]_{B,i} \\
&+ k_{on,V121R1N1}^B [V_{121}]_B [R_1 N_1]_{B,i} - k_{off,V121R1N1}^B [V_{121} R_1 N_1]_{B,i}
\end{aligned} \tag{S.47, S.48}$$

$$\begin{aligned}
\frac{d[A]_B}{dt} &= q_A - c_A [A]_B - k_{on,V165,A}^B [V_{165}]_B [A]_B + k_{off,V165A}^B [V_{165} A]_B \\
&- k_{on,V121,A}^B [V_{121}]_B [A]_B + k_{off,V121A}^B [V_{121} A]_B \\
&+ k_{pA}^{BN} \frac{S_{NB}}{U_p} [A]_B - \left( \frac{k_L + k_{pA}^{NB} S_{NB}}{U_B} \right) \frac{[A]_N}{K_{AV,N}}
\end{aligned} \tag{S.49}$$

$$\begin{aligned}
\frac{d[V_{165} A]_B}{dt} &= -c_{V165A} [V_{165} A]_B + k_{on,V165,A}^B [V_{165}]_B [A]_B - k_{off,V165A}^B [V_{165} A]_B \\
&- k_{pA}^{BN} \frac{S_{NB}}{U_p} [V_{165} A]_B + \left( \frac{k_L + k_{pA}^{NB} S_{NB}}{U_B} \right) \frac{[V_{165} A]_N}{K_{AV,N}}
\end{aligned} \tag{S.50}$$

$$\begin{aligned}
\frac{d[V_{121}A]_B}{dt} &= -c_{V121A}[V_{121}A]_B + k_{on,V121,A}^B[V_{121}]_B[A]_B - k_{off,V121A}^B[V_{121}A]_B \\
&\quad - k_{pA}^{BN} \frac{S_{NB}}{U_p}[V_{121}A]_B + \left( \frac{k_L + k_{pA}^{NB} S_{NB}}{U_B} \right) \frac{[V_{121}A]_N}{K_{AV,N}}
\end{aligned} \tag{S.51}$$

### C. Interstitial space in tumor compartment

We denote the receptors and ligand-receptor complexes by the subscript  $i$  ( $i=T$  for tumor ECs;

$i=tumor$  for tumor cells).

$$\begin{aligned}
\frac{d[V_{165}]_T}{dt} &= q_{V165}^T - k_{on,V165,MEBM}^T [V_{165}]_T [M_{EBM}]_T + k_{off,V165,MEBM}^T [V_{165}M_{EBM}]_T \\
&\quad - k_{on,V165,MPBM}^T [V_{165}]_T [M_{PBM}]_T + k_{off,V165,MPBM}^T [V_{165}M_{PBM}]_T \\
&\quad - k_{on,V165,MECM}^T [V_{165}]_T [M_{ECM}]_T + k_{off,V165,MECM}^T [V_{165}M_{ECM}]_T \\
&\quad - k_{on,V165,R1}^{T,i} [V_{165}]_T [R_1]_{T,i} + k_{off,V165R1}^T [V_{165}R_1]_{T,i} \\
&\quad - k_{on,V165,R2}^{T,i} [V_{165}]_T [R_2]_{T,i} + k_{off,V165R2}^T [V_{165}R_2]_{T,i} \\
&\quad - k_{on,V165,N1}^{T,i} [V_{165}]_T [N_1]_{T,i} + k_{off,V164N1}^T [V_{165}N_1]_{T,i} \\
&\quad - k_{on,V165,N2}^{T,tumor} [V_{165}]_T [N_2]_{T,tumor} + k_{off,V164N2}^{T,tumor} [V_{165}N_2]_{T,tumor} \\
&\quad - k_{on,V165,A}^T [V_{165}]_T [A]_T + k_{off,V164A}^T [V_{165}A]_T \\
&\quad - \left( \frac{k_L + k_{pV}^{TB} S_{TB}}{U_T} \right) \frac{[V_{165}]_T}{K_{AV,T}} + k_{pV}^{BT} \frac{S_{TB}}{U_T} \frac{U_B}{U_P} [V_{165}]_B
\end{aligned} \tag{S.52}$$

$$\begin{aligned}
\frac{d[V_{121}]_T}{dt} &= q_{V121}^T - k_{on,V121,R1}^T [V_{121}]_T [R_1]_{N,i} + k_{off,V121R1}^T [V_{121}R_1]_{T,i} \\
&\quad - k_{on,V121,R1N1}^T [V_{121}]_T [R_1N_1]_{T,i} + k_{off,V121R1N1}^T [V_{121}R_1N_1]_{T,i} \\
&\quad - k_{on,V121,R2}^T [V_{121}]_T [R_2]_{T,i} + k_{off,V121R2}^T [V_{121}R_2]_{T,i} \\
&\quad - k_{on,V121,A}^T [V_{121}]_T [A]_T + k_{off,V121A}^T [V_{121}A]_T \\
&\quad - \left( \frac{k_L + k_{pV}^{TB} S_{TB}}{U_T} \right) \frac{[V_{121}]_T}{K_{AV,T}} + k_{pV}^{BT} \frac{S_{TB}}{U_T} \frac{U_B}{U_P} [V_{121}]_B
\end{aligned} \tag{S.53}$$

$$\frac{d[M_{EBM}]_T}{dt} = -k_{on,V165,MEBM}^N [V_{165}]_T [M_{EBM}]_T + k_{off,V165MEBM}^T [V_{165}M_{EBM}]_T \tag{S.54}$$

$$\frac{d[M_{PBM}]_T}{dt} = -k_{on,V165,MPBM}^T [V_{165}]_T [M_{PBM}]_T + k_{off,V165MPBM}^T [V_{165}M_{PBM}]_T \tag{S.55}$$



$$\frac{d[M_{ECM}]_T}{dt} = -k_{on,V165,MECM}^T [V_{165}]_T [M_{ECM}]_T + k_{off,V165MECM}^T [V_{165}M_{ECM}]_T \quad (S.56)$$

$$\frac{d[V_{165}M_{EBM}]_T}{dt} = k_{on,V165,MEBM}^T [V_{165}]_T [M_{EBM}]_T - k_{off,V165MEBM}^T [V_{165}M_{EBM}]_T \quad (S.57)$$

$$\frac{d[V_{165}M_{PBM}]_T}{dt} = k_{on,V165,MPBM}^T [V_{165}]_T [M_{PBM}]_T - k_{off,V165MPBM}^T [V_{165}M_{PBM}]_T \quad (S.58)$$

$$\frac{d[V_{165}M_{ECM}]_T}{dt} = k_{on,V165,MECM}^T [V_{165}]_T [M_{ECM}]_T - k_{off,V165MECM}^T [V_{165}M_{ECM}]_T \quad (S.59)$$

$$\begin{aligned} \frac{d[R_1]_{T,i}}{dt} = & s_{R1}^T - k_{int,R1}^T [R_1]_{T,i} - k_{on,V165,R1}^T [V_{165}]_T [R_1]_{T,i} + k_{off,V165R1}^T [V_{165}R_1]_{T,i} \\ & - k_{on,V121,R1}^T [V_{121}]_T [R_1]_{T,i} + k_{off,V121R1}^T [V_{121}R_1]_{T,i} \\ & - k_{c,R1,N1}^T [N_1]_{T,i} [R_1]_{T,i} + k_{dissoc,R1N1}^T [R_1N_1]_{T,i} \end{aligned} \quad (S.60, S.61)$$

$$\begin{aligned} \frac{d[R_2]_{T,i}}{dt} = & s_{R2}^T - k_{int,R2}^T [R_2]_{T,i} - k_{on,V121,R2}^T [V_{121}]_T [R_2]_{T,i} + k_{off,V120R2}^T [V_{121}R_2]_{T,i} \\ & - k_{on,V1645R2}^T [V_{165}]_T [R_2]_{T,i} + k_{off,V165R2}^T [V_{165}R_2]_{T,i} \\ & - k_{c,V165N1,R2}^T [V_{165}N_1]_{T,i} [R_2]_{T,i} + k_{off,V165N1,R2}^T [R_2V_{165}N_1]_{T,i} \end{aligned} \quad (S.62, S.63)$$

$$\begin{aligned} \frac{d[N_1]_{T,i}}{dt} = & s_{N1}^T - k_{int,N1}^T [N_1]_T - k_{c,V121R1,N1}^T [V_{121}R_1]_{T,i} [N_1]_{T,i} + k_{dissoc,R1N1}^T [V_{121}R_1N_1]_{T,i} \\ & - k_{c,R1,N1}^T [N_1]_{T,i} [R_1]_{T,i} + k_{dissoc,R1N1}^T [R_1N_1]_{T,i} \\ & - k_{on,V165,N1}^T [V_{165}]_T [N_1]_{T,i} + k_{off,V165N1}^T [V_{165}N_1]_{T,i} \\ & - k_{c,V165R2,N1}^T [V_{165}R_2]_{T,i} [N_1]_{T,i} + k_{off,V165R2,N1}^T [R_2V_{165}N_1]_{T,i} \end{aligned} \quad (S.64, S.65)$$

$$\begin{aligned} \frac{d[N_2]_T}{dt} = & s_{N2} - k_{int,N2} [N_2]_T \\ & + k_{on,V165,N2} [V_{165}]_T [N_2]_T - k_{off,V165N2} [V_{165}N_2]_T \end{aligned} \quad (S.66)$$

$$\frac{d[V_{165}R_1]_{T,i}}{dt} = -k_{int,V165R1}^T [V_{164}R_1]_{T,i} + k_{on,V165,R1}^T [V_{165}]_T [R_1]_{T,i} - k_{off,V165R1}^N [V_{165}R_1]_{T,i} \quad (S.67, S.68)$$

$$\begin{aligned} \frac{d[V_{165}R_2]_{T,i}}{dt} = & -k_{int,V165R2}^T [V_{165}R_2]_{T,i} + k_{on,V165,R2}^T [V_{165}]_T [R_2]_{T,i} - k_{off,V165R2}^T [V_{165}R_2]_{T,i} \\ & - k_{c,V165R2,N1}^T [V_{165}R_2]_{T,i} [N_1]_{T,i} + k_{off,V165R2N1}^T [R_2V_{165}N_1]_{T,i} \end{aligned} \quad (S.69, S.70)$$

$$\begin{aligned} \frac{d[V_{165}N_1]_{T,i}}{dt} &= -k_{int,V165N1}^T[V_{165}N_1]_{T,i} + k_{on,V165,N1}^T[V_{165}]_T[N_1]_{T,i} - k_{off,V165N1}^T[V_{165}N_1]_{T,i} \\ &\quad - k_{c,V165N1,R2}^T[V_{165}N_1]_{T,i}[R_2]_{T,i} + k_{off,V165N1R2}^T[R_2V_{165}N_1]_{T,i} \end{aligned} \quad (\text{S.71, S.72})$$

$$\begin{aligned} \frac{d[R_2V_{165}N_1]_{T,i}}{dt} &= -k_{int,V165R2N1}^T[R_2V_{165}N_1]_{T,i} \\ &\quad + k_{c,V165R2,N1}^T[V_{165}R_2]_{T,i}[N_1]_{T,i} - k_{off,V165R2N1}^T[R_2V_{165}N_1]_{T,i} \\ &\quad + k_{c,V165N1,R2}^T[V_{165}N_1]_{T,i}[R_2]_{T,i} - k_{off,V165N1R2}^T[R_2V_{165}N_1]_{T,i} \end{aligned} \quad (\text{S.73, S.74})$$

$$\begin{aligned} \frac{d[V_{121}R_1]_{T,i}}{dt} &= -k_{int,V121R1}^T[V_{121}R_1]_{T,i} \\ &\quad + k_{on,V121,R1}^T[V_{121}]_T[R_1]_{T,i} - k_{off,V121R1}^T[V_{121}R_1]_{T,i} \\ &\quad - k_{c,R1,N1}^T[V_{121}R_1]_{T,i}[N_1]_{T,i} + k_{dissoc,R1N1}^T[V_{121}R_1N_1]_{T,i} \end{aligned} \quad (\text{S.75, S.76})$$

$$\frac{d[V_{121}R_2]_{T,i}}{dt} = -k_{int,V121R2}^T[V_{121}R_2]_{T,i} + k_{on,V121,R2}^T[V_{121}]_T[R_2]_{T,i} - k_{off,V121R2}^T[V_{121}R_2]_{T,i} \quad (\text{S.77, S.78})$$

$$\begin{aligned} \frac{d[V_{121}R_1N_1]_{T,i}}{dt} &= -k_{int,V121R1N1}^T[V_{121}R_1N_1]_{T,i} \\ &\quad + k_{c,V121R1,N1}^T[V_{121}R_1]_{T,i}[N_1]_{T,i} - k_{dissoc,V121N1}^T[V_{121}R_1N_1]_{T,i} \\ &\quad + k_{on,V121R1N1}^T[V_{121}]_T[R_1N_1]_{T,i} - k_{off,V121R1N1}^T[V_{121}R_1N_1]_{T,i} \end{aligned} \quad (\text{S.79, S.80})$$

$$\begin{aligned} \frac{d[R_1N_1]_{T,i}}{dt} &= -k_{int,R1N1}^T[R_1N_1]_{T,i} \\ &\quad + k_{c,R1,N1}^T[R_1]_{T,i}[N_1]_{T,i} - k_{dissoc,R1N1}^T[R_1N_1]_{T,i} \\ &\quad - k_{on,V121,R1}^T[V_{121}]_T[R_1N_1]_{T,i} + k_{off,V121R1}^T[V_{121}R_1N_1]_{T,i} \end{aligned} \quad (\text{S.81, S.82})$$

$$\begin{aligned} \frac{d[V_{165}N_2]_T}{dt} &= -k_{int,V165N2}^T[V_{165}N_2]_T + k_{on,V165,N2}^T[V_{165}]_T[N_2]_T - k_{off,V165N2}^T[V_{165}N_2]_T \\ &\quad - k_{c,V165N2,R2}^T[V_{165}N_2]_T[R_2]_{T,i} + k_{off,V165N2R2}^T[R_2V_{165}N_2]_T \end{aligned} \quad (\text{S.83})$$

$$\begin{aligned} \frac{d[R_2V_{165}N_2]_T}{dt} &= -k_{int,V165R2N2}^T[R_2V_{165}N_2]_T \\ &\quad + k_{c,V165R2,N2}^T[V_{165}R_2]_{T,i}[N_2]_T - k_{off,V165R2N2}^T[R_2V_{165}N_2]_T \\ &\quad + k_{c,V165N2,R2}^T[V_{165}N_2]_T[R_2]_{T,i} - k_{off,V165N2R2}^T[R_2V_{165}N_2]_T \end{aligned} \quad (\text{S.84})$$

$$\begin{aligned}
\frac{d[R_1 N_2]_T}{dt} &= -k_{int,R1N1}^T [R_1 N_2]_T \\
&+ k_{c,R1,N2}^T [R_1]_{T,i} [N_2]_T - k_{dissoc,R1N2}^T [R_1 N_2]_T \\
&- k_{on,V121,R1}^T [V_{121}]_T [R_1 N_2]_T + k_{off,V121R1}^T [V_{121} R_1 N_2]_T
\end{aligned} \tag{S.85}$$

$$\begin{aligned}
\frac{d[V_{121} R_1 N_2]_T}{dt} &= -k_{intV121R1N2}^T [V_{121} R_1 N_2]_T \\
&+ k_{c,V121R1,N2}^T [V_{121} R_1]_{T,i} [N_2]_T - k_{dissoc,V121N2}^T [V_{121} R_1 N_2]_T \\
&+ k_{on,V121R1N2}^T [V_{121}]_T [R_1 N_2]_T - k_{off,V121R1N2}^T [V_{121} R_1 N_2]_T
\end{aligned} \tag{S.86}$$

$$\begin{aligned}
\frac{d[A]_T}{dt} &= -k_{on,V165,A}^T [V_{165}]_T [A]_T + k_{off,V165A}^N [V_{165} A]_T \\
&- k_{on,V121,A}^T [V_{121}]_T [A]_T + k_{off,V121A}^N [V_{121} A]_T \\
&+ k_{pA}^{BT} \frac{S_{TB}}{U_T} \frac{U_B}{U_P} [A]_B - \left( \frac{k_L + k_{pA}^{TB} S_{TB}}{U_T} \right) \frac{[A]_T}{K_{AV,T}}
\end{aligned} \tag{S.87}$$

$$\begin{aligned}
\frac{d[V_{165} A]_T}{dt} &= k_{on,V165,A}^T [V_{165}]_T [A]_T - k_{off,V165A}^N [V_{165} A]_T \\
&+ k_{pA}^{BT} \frac{S_{TB}}{U_T} \frac{U_B}{U_P} [V_{165} A]_B - \left( \frac{k_L + k_{pA}^{TB} S_{TB}}{U_T} \right) \frac{[V_{165} A]_T}{K_{AV,T}}
\end{aligned} \tag{S.88}$$

$$\begin{aligned}
\frac{d[V_{121} A]_T}{dt} &= k_{on,V121,A}^T [V_{121}]_T [A]_T - k_{off,V121A}^N [V_{121} A]_T \\
&+ k_{pA}^{BT} \frac{S_{TB}}{U_T} \frac{U_B}{U_P} [V_{121} A]_B - \left( \frac{k_L + k_{pA}^{TB} S_{TB}}{U_T} \right) \frac{[V_{121} A]_T}{K_{AV,T}}
\end{aligned} \tag{S.89}$$

### III. Glossary

#### A. Concentrations

|                                                           |                                                                      |
|-----------------------------------------------------------|----------------------------------------------------------------------|
| $[V_{121}], [V_{165}]$                                    | Concentration of unbound VEGF <sub>121</sub> and VEGF <sub>165</sub> |
| $[M_{ECM}], [M_{EBM}], [M_{PBM}]$                         | Concentration of VEGF binding sites in the ECM, EBM, and PBM         |
| $[V_{165} M_{ECM}], [V_{165} M_{EBM}], [V_{165} M_{PBM}]$ | Concentration of VEGF <sub>165</sub> bound to the ECM, EBM, and PBM  |

|                   |                                                                            |
|-------------------|----------------------------------------------------------------------------|
| $[R_1], [R_2]$    | Concentration of un-occupied VEGFR-1 and VEGFR-2 receptor tyrosine kinases |
| $[N_1]$           | Concentration of un-occupied NRP1 co-receptor                              |
| $[N_2]$           | Concentration of un-occupied NRP2 co-receptor                              |
| $[R_1N_1]$        | Concentration of the VEGFR1-NRP1 complex                                   |
| $[R_1N_2]$        | Concentration of the VEGFR1-NRP2 complex                                   |
| $[V_iR_j]$        | Concentration of VEGF isoform $i$ bound to VEGFR $j$                       |
| $[V_iN_1]$        | Concentration of VEGF isoform $i$ bound to NRP1                            |
| $[V_iN_2]$        | Concentration of VEGF isoform $i$ bound to NRP2                            |
| $[R_2V_{165}N_1]$ | Concentration of the VEGFR2-VEGF <sub>165</sub> -NRP1 ternary complex      |
| $[R_2V_{165}N_2]$ | Concentration of the VEGFR2-VEGF <sub>165</sub> -NRP2 ternary complex      |
| $[V_{121}R_1N_1]$ | Concentration of the VEGF <sub>121</sub> -VEGFR1-NRP1 ternary complex      |
| $[V_{121}R_1N_2]$ | Concentration of the VEGF <sub>121</sub> -VEGFR1-NRP2 ternary complex      |
| $[A]$             | Concentration of anti-VEGF agent                                           |
| $[V_iA]$          | Concentration of VEGF isoform $i$ bound to anti-VEGF agent                 |

## B. Geometric parameters

|            |                                                                                                                         |
|------------|-------------------------------------------------------------------------------------------------------------------------|
| $U_i$      | Volume of compartment $i$ ( $N$ =normal tissue, $B$ =blood, $P$ =plasma, $T$ =tumor)                                    |
| $S_{iB}$   | Total surface area of endothelial cells at the interface of compartment $i$ and blood ( $N$ =normal tissue, $T$ =tumor) |
| $K_{AV,i}$ | Available volume fraction in the tissue, i.e., ratio of available fluid volume to total tissue volume $U_i$             |

### C. Kinetic parameters

|                             |                                                                                                                                                                |
|-----------------------------|----------------------------------------------------------------------------------------------------------------------------------------------------------------|
| $q_{V121}, q_{V165}$        | Secretion rate of VEGF <sub>121</sub> and VEGF <sub>165</sub>                                                                                                  |
| $q_A$                       | Injection rate of exogenous anti-VEGF agent; $q_A = 7.78$ mg/min during the infusion time (90 minutes) and $q_A = 0$ at all other times.                       |
| $s_R$                       | Insertion rate of receptors into the cell membrane of endothelial cells or myocytes                                                                            |
| $k_{on}$                    | Kinetic binding rate                                                                                                                                           |
| $k_{off}$                   | Kinetic unbinding rate                                                                                                                                         |
| $k_c$                       | Kinetic coupling rate for receptors                                                                                                                            |
| $k_{int}$                   | Internalization rate of receptors                                                                                                                              |
| $k_{pV}^{ij}$               | Microvascular permeability of VEGF from compartment $i$ to compartment $j$ ( $N$ =normal tissue, $B$ =blood, $T$ =tumor)                                       |
| $k_{pA}^{ij}$               | Microvascular permeability of anti-VEGF agent and VEGF/anti-VEGF complex from compartment $i$ to compartment $j$ ( $N$ =normal tissue, $B$ =blood, $T$ =tumor) |
| $k_L$                       | Lymphatic drainage rate                                                                                                                                        |
| $c_{V121}, c_{V165}$        | Rate of plasma clearance of VEGF <sub>121</sub> and VEGF <sub>165</sub>                                                                                        |
| $c_A, c_{V121A}, c_{V165A}$ | Rate of plasma clearance of anti-VEGF and VEGF/anti-VEGF complex                                                                                               |

#### IV. Model parameters

**Table S1: Whole-body parameters**

|               | <b>Parameter</b>                         | <b>Value</b> | <b>Unit</b>     |
|---------------|------------------------------------------|--------------|-----------------|
| <b>Normal</b> | Total volume                             | 61321        | cm <sup>3</sup> |
|               | Available fluid volume for VEGF          | 3825         | cm <sup>3</sup> |
| <b>Blood</b>  | Total volume                             | 5            | L               |
|               | Available fluid volume for VEGF (plasma) | 2.717        | L               |
| <b>Tumor</b>  | Total volume                             | 33.5         | cm <sup>3</sup> |
|               | Available fluid volume for VEGF          | 17.5         | cm <sup>3</sup> |

**Table S2: Geometric parameters**

|                                         | Value (Normal)                            | Reference         | Value (Tumor)                             | Reference         |
|-----------------------------------------|-------------------------------------------|-------------------|-------------------------------------------|-------------------|
| <b>Cell geometry</b>                    |                                           |                   |                                           |                   |
| Perimeter of myofiber                   | 222 $\mu\text{m}$                         | Calculated in (1) | -                                         | -                 |
| Cross-sectional area of myofiber        | 3000 $\mu\text{m}^2$                      | Calculated in (1) | -                                         | -                 |
| SMND surface area                       | 1850 $\mu\text{m}^2$                      | Calculated in (1) | -                                         | -                 |
| Myofiber density                        | 304 per $\text{mm}^2$ tissue              | Calculated in (1) | -                                         | -                 |
| Tumor cell external diameter            | -                                         | -                 | 17 $\mu\text{m}$                          | (2)               |
| Surface area of one tumor cell          | -                                         | -                 | 997 $\mu\text{m}^2$                       | Calculated in (3) |
| Volume of one tumor cell                | -                                         | -                 | 2572 $\mu\text{m}^3$                      | Calculated in (3) |
| <b>Microvessels</b>                     |                                           |                   |                                           |                   |
| Perimeter of one microvessel            | 26 $\mu\text{m}$                          | Calculated in (1) | 43.7 $\mu\text{m}$                        | Calculated in (3) |
| Cross-sectional area of one microvessel | 45 $\mu\text{m}^2$                        | Calculated in (1) | 100.3 $\mu\text{m}^2$                     | Calculated in (3) |
| Average diameter of one microvessel     | 7.56 $\mu\text{m}$                        | Calculated in (1) | 10.3 $\mu\text{m}$                        | (4)               |
| Endothelial cell thickness              | 0.5 $\mu\text{m}$                         | (5)               | 0.5 $\mu\text{m}$                         | Calculated in (3) |
| Capillary-myofiber ratio                | 1.38                                      | (6)               | -                                         | -                 |
| Capillary density                       | 420 per $\text{mm}^2$ tissue              | Calculated in (1) | 235 per $\text{mm}^2$ tissue              | Calculated in (3) |
| <b>Surface areas</b>                    |                                           |                   |                                           |                   |
| Tissue cells                            | 664 $\text{cm}^2/\text{cm}^3$ tissue      | Calculated in (1) | 1534 $\text{cm}^2/\text{cm}^3$ tissue     | Calculated in (3) |
| Microvessels                            | 108 $\text{cm}^2/\text{cm}^3$ tissue      | Calculated in (1) | 105 $\text{cm}^2/\text{cm}^3$ tissue      | Calculated in (3) |
| <b>Basement membranes (BM)</b>          |                                           |                   |                                           |                   |
| Thickness of tissue cell BM             | 24 nm                                     | (7)               | 30 nm                                     | Calculated in (3) |
| Thickness of microvessel BM             | 43 nm                                     | (7)               | 50 nm                                     | Calculated in (3) |
| Volume of parenchymal cell BM           | 0.00159 $\text{cm}^3/\text{cm}^3$ tissue  | Calculated in (8) | 0.00388 $\text{cm}^3/\text{cm}^3$ tissue  | Calculated in (8) |
| of which available to VEGF              | 0.000307 $\text{cm}^3/\text{cm}^3$ tissue | Calculated in (8) | 0.002446 $\text{cm}^3/\text{cm}^3$ tissue | Calculated in (8) |
| Volume of microvessel BM                | 0.00045 $\text{cm}^3/\text{cm}^3$ tissue  | Calculated in (8) | 0.00043 $\text{cm}^3/\text{cm}^3$ tissue  | Calculated in (8) |
| of which available to VEGF              | 0.000087 $\text{cm}^3/\text{cm}^3$ tissue | Calculated in (8) | 0.00027 $\text{cm}^3/\text{cm}^3$ tissue  | Calculated in (8) |
| Volume of extracellular matrix          | 0.07951 $\text{cm}^3/\text{cm}^3$ tissue  | Calculated in (8) | 0.6062 $\text{cm}^3/\text{cm}^3$ tissue   | Calculated in (8) |
| of which available to VEGF              | 0.061987 $\text{cm}^3/\text{cm}^3$ tissue | Calculated in (8) | 0.519308 $\text{cm}^3/\text{cm}^3$ tissue | Calculated in (8) |
| <b>Volume fractions</b>                 |                                           |                   |                                           |                   |
| Interstitial space                      | 0.0816 $\text{cm}^3/\text{cm}^3$ tissue   | (9, 10)           | 0.611 $\text{cm}^3/\text{cm}^3$ tissue    | (11, 12)          |
| of which available to VEGF              | 0.062381 $\text{cm}^3/\text{cm}^3$ tissue | Calculated in (8) | 0.522024 $\text{cm}^3/\text{cm}^3$ tissue | Calculated in (8) |
| Microvessels                            | 0.0186 $\text{cm}^3/\text{cm}^3$ tissue   | Calculated in (1) | 0.024 $\text{cm}^3/\text{cm}^3$ tissue    | Calculated in (3) |
| of which vascular space                 | 0.0140 $\text{cm}^3/\text{cm}^3$ tissue   | (13)              | 0.020 $\text{cm}^3/\text{cm}^3$ tissue    | Calculated in (3) |
| Tissue cells                            | 0.8998 $\text{cm}^3/\text{cm}^3$ tissue   | Calculated in (1) | 0.370 $\text{cm}^3/\text{cm}^3$ tissue    | Calculated in (3) |

SMND = skeletal muscle nuclear domain; BM = basement membrane.

**Table S3: Kinetic parameters**

|                                           | Measured parameters  |                                       | Reference  | Model parameters     |                      |                      | Unit                                                  |
|-------------------------------------------|----------------------|---------------------------------------|------------|----------------------|----------------------|----------------------|-------------------------------------------------------|
|                                           | Value                | Unit                                  |            | Value (Normal)       | Value (Blood)        | Value (Tumor)        |                                                       |
| <b>VEGF binding to VEGFR1</b>             |                      |                                       |            |                      |                      |                      |                                                       |
| $k_{on}$                                  | $3.0 \times 10^7$    | $M^{-1}s^{-1}$                        | (3, 8)     | $4.8 \times 10^{-1}$ | $5.5 \times 10^{-2}$ | $5.8 \times 10^{-2}$ | $(\text{pmol}/\text{cm}^3 \text{ tissue})^{-1}s^{-1}$ |
| $k_{off}$                                 | $1.0 \times 10^{-3}$ | $s^{-1}$                              | (3, 8)     |                      |                      |                      |                                                       |
| $K_d$                                     | 33                   | pM                                    | (3, 8)     | $2.1 \times 10^{-3}$ | $1.8 \times 10^{-2}$ | $1.7 \times 10^{-2}$ | pmol/cm <sup>3</sup> tissue                           |
| <b>VEGF binding to VEGFR2</b>             |                      |                                       |            |                      |                      |                      |                                                       |
| $k_{on}$                                  | $1.0 \times 10^7$    | $M^{-1}s^{-1}$                        | (3, 8)     | $1.6 \times 10^{-1}$ | $1.8 \times 10^{-2}$ | $1.9 \times 10^{-2}$ | $(\text{pmol}/\text{cm}^3 \text{ tissue})^{-1}s^{-1}$ |
| $k_{off}$                                 | $1.0 \times 10^{-3}$ | $s^{-1}$                              | (3, 8)     |                      |                      |                      |                                                       |
| $K_d$                                     | 100                  | pM                                    | (3, 8)     | $6.2 \times 10^{-3}$ | $5.4 \times 10^{-2}$ | $5.2 \times 10^{-2}$ | pmol/cm <sup>3</sup> tissue                           |
| <b>VEGF<sub>165</sub> binding to NRP1</b> |                      |                                       |            |                      |                      |                      |                                                       |
| $k_{on}$                                  | $3.2 \times 10^6$    | $M^{-1}s^{-1}$                        | (3, 8)     | $5.1 \times 10^{-2}$ | $5.9 \times 10^{-3}$ | $6.1 \times 10^{-3}$ | $(\text{pmol}/\text{cm}^3 \text{ tissue})^{-1}s^{-1}$ |
| $k_{off}$                                 | $1.0 \times 10^{-3}$ | $s^{-1}$                              | (3, 8)     |                      |                      |                      |                                                       |
| $K_d$                                     | 312                  | pM                                    | (3, 8)     | $2.0 \times 10^{-2}$ | $1.7 \times 10^{-1}$ | $1.6 \times 10^{-1}$ | pmol/cm <sup>3</sup> tissue                           |
| <b>VEGF<sub>165</sub> binding to NRP2</b> |                      |                                       |            |                      |                      |                      |                                                       |
| $k_{on}$                                  | $1.0 \times 10^6$    | $M^{-1}s^{-1}$                        | (14, 15)   | -                    | -                    | $1.9 \times 10^{-3}$ | $(\text{pmol}/\text{cm}^3 \text{ tissue})^{-1}s^{-1}$ |
| $k_{off}$                                 | $1.0 \times 10^{-3}$ | $s^{-1}$                              | (3, 8)     |                      |                      |                      |                                                       |
| $K_d$                                     | 1                    | nM                                    | Calculated | -                    | -                    |                      | pmol/cm <sup>3</sup> tissue                           |
| <b>VEGF<sub>165</sub> binding to GAGs</b> |                      |                                       |            |                      |                      |                      |                                                       |
| $k_{on}$                                  | $4.2 \times 10^5$    | $M^{-1}s^{-1}$                        | (3, 8)     | $6.7 \times 10^{-3}$ | -                    | $8.0 \times 10^{-4}$ | $(\text{pmol}/\text{cm}^3 \text{ tissue})^{-1}s^{-1}$ |
| $k_{off}$                                 | $1.0 \times 10^{-2}$ | $s^{-1}$                              | (3, 8)     |                      |                      |                      |                                                       |
| $K_d$                                     | 24                   | nM                                    | (3, 8)     | 2.71                 | -                    | $5.2 \times 10^{-1}$ | pmol/cm <sup>3</sup> tissue                           |
| <b>Coupling of NRP1/2 and VEGFR1</b>      |                      |                                       |            |                      |                      |                      |                                                       |
| $k_{c \text{ R1,N}}$                      | $1.0 \times 10^{14}$ | $(\text{mol}/\text{cm}^2)^{-1}s^{-1}$ | (3, 8)     | $9.3 \times 10^{-1}$ | $9.3 \times 10^{-1}$ | $9.5 \times 10^{-1}$ | $(\text{pmol}/\text{cm}^3 \text{ tissue})^{-1}s^{-1}$ |
| $k_{dissoc \text{ R1,N}}$                 | $1.0 \times 10^{-2}$ | $s^{-1}$                              | (3, 8)     |                      |                      |                      |                                                       |
| <b>Coupling of NRP1/2 and VEGFR2</b>      |                      |                                       |            |                      |                      |                      |                                                       |
| $k_{c \text{ V165R2,N}}$                  | $3.1 \times 10^{13}$ | $(\text{mol}/\text{cm}^2)^{-1}s^{-1}$ | (3, 8)     | $2.9 \times 10^{-1}$ | $2.9 \times 10^{-1}$ | $3.0 \times 10^{-1}$ | $(\text{pmol}/\text{cm}^3 \text{ tissue})^{-1}s^{-1}$ |
| $k_{off \text{ V165R2,N}}$                | $1.0 \times 10^{-3}$ | $s^{-1}$                              | (3, 8)     |                      |                      |                      |                                                       |
| $k_{c \text{ V165N,R2}}$                  | $1.0 \times 10^{14}$ | $(\text{mol}/\text{cm}^2)^{-1}s^{-1}$ | (3, 8)     | $9.3 \times 10^{-1}$ | $9.3 \times 10^{-1}$ | $9.5 \times 10^{-1}$ | $(\text{pmol}/\text{cm}^3 \text{ tissue})^{-1}s^{-1}$ |
| $k_{off \text{ V165N,R2}}$                | $1.0 \times 10^{-3}$ | $s^{-1}$                              | (3, 8)     |                      |                      |                      |                                                       |



|                                  | Measured parameters   |                | Reference | Model parameters     |                      |                      | Unit                                                         |
|----------------------------------|-----------------------|----------------|-----------|----------------------|----------------------|----------------------|--------------------------------------------------------------|
|                                  | Value                 | Unit           |           | Value (Normal)       | Value (Blood)        | Value (Tumor)        |                                                              |
| <b>VEGFR internalization</b>     |                       |                |           |                      |                      |                      |                                                              |
| $k_{int, R}$                     | $2.8 \times 10^{-4}$  | $s^{-1}$       | (3, 8)    |                      |                      |                      |                                                              |
| $k_{int, C}$                     | $2.80 \times 10^{-4}$ | $s^{-1}$       | (3, 8)    |                      |                      |                      |                                                              |
| <b>VEGF binding to anti-VEGF</b> |                       |                |           |                      |                      |                      |                                                              |
| $k_{on}$                         | $9.20 \times 10^4$    | $M^{-1}s^{-1}$ | (16)      | $1.5 \times 10^{-3}$ | $1.6 \times 10^{-4}$ | $1.8 \times 10^{-4}$ | $(\text{pmol}/\text{cm}^3 \text{ tissue})^{-1}\text{s}^{-1}$ |
| $k_{off}$                        | $2.00 \times 10^{-4}$ | $s^{-1}$       | (16)      |                      |                      |                      |                                                              |
| $K_d$                            | 2.2                   | nM             | (16)      | $1.4 \times 10^{-1}$ | 1.2                  | 1.1                  | $\text{pmol}/\text{cm}^3 \text{ tissue}$                     |

Conversions to model parameters:

Normal:  $6.24 \times 10^7$  (pmol/cm<sup>3</sup> tissue)/M and  $1.08 \times 10^{14}$  (pmol/cm<sup>3</sup> tissue)/(mol/cm<sup>2</sup> EC)

Blood:  $5.43 \times 10^8$  (pmol/cm<sup>3</sup> tissue)/M and  $1.08 \times 10^{14}$  (pmol/cm<sup>3</sup> tissue)/(mol/cm<sup>2</sup> EC)

Tumor:  $5.22 \times 10^8$  (pmol/cm<sup>3</sup> tissue)/M and  $1.05 \times 10^{14}$  (pmol/cm<sup>3</sup> tissue)/(mol/cm<sup>2</sup> EC)

**Table S4: Receptor densities**

|                         | Measured parameters |                | Model parameters      |                             |
|-------------------------|---------------------|----------------|-----------------------|-----------------------------|
|                         | Value               | Unit           | Value                 | Unit                        |
| <b>VEGFR1</b>           |                     |                |                       |                             |
| Luminal EC (normal)     | 550                 | rec/EC         | $1.21 \times 10^{-1}$ | pmol/cm <sup>3</sup> tissue |
| Abluminal EC (normal)   | 550                 | rec/EC         | $9.86 \times 10^{-3}$ | pmol/cm <sup>3</sup> tissue |
| Luminal EC (diseased)   | 3,750               | rec/EC         | $4.38 \times 10^{-4}$ | pmol/cm <sup>3</sup> tissue |
| Abluminal EC (diseased) | 3,750               | rec/EC         | $6.54 \times 10^{-2}$ | pmol/cm <sup>3</sup> tissue |
| Myocytes                | 0                   | rec/myocyte    | 0                     | pmol/cm <sup>3</sup> tissue |
| Tumor cells             | 1,100               | rec/tumor cell | $2.81 \times 10^{-1}$ | pmol/cm <sup>3</sup> tissue |
| <b>VEGFR2</b>           |                     |                |                       |                             |
| Luminal EC (normal)     | 350                 | rec/EC         | $7.70 \times 10^{-2}$ | pmol/cm <sup>3</sup> tissue |
| Abluminal EC (normal)   | 350                 | rec/EC         | $6.28 \times 10^{-3}$ | pmol/cm <sup>3</sup> tissue |
| Luminal EC (diseased)   | 300                 | rec/EC         | $3.51 \times 10^{-5}$ | pmol/cm <sup>3</sup> tissue |
| Abluminal EC (diseased) | 300                 | rec/EC         | $5.23 \times 10^{-3}$ | pmol/cm <sup>3</sup> tissue |
| Myocytes                | 0                   | rec/myocyte    | 0                     | pmol/cm <sup>3</sup> tissue |
| Tumor cells             | 550                 | rec/tumor cell | $1.41 \times 10^{-1}$ | pmol/cm <sup>3</sup> tissue |
| <b>NRP1</b>             |                     |                |                       |                             |
| Luminal EC (normal)     | 17,500              | rec/EC         | 3.74                  | pmol/cm <sup>3</sup> tissue |
| Abluminal EC (normal)   | 17,500              | rec/EC         | $3.05 \times 10^{-1}$ | pmol/cm <sup>3</sup> tissue |
| Luminal EC (diseased)   | 20,000 <sup>†</sup> | rec/EC         | $2.34 \times 10^{-3}$ | pmol/cm <sup>3</sup> tissue |
| Abluminal EC (diseased) | 20,000 <sup>†</sup> | rec/EC         | $3.49 \times 10^{-1}$ | pmol/cm <sup>3</sup> tissue |
| Myocytes                | 34,500              | rec/myocyte    | 2.06                  | pmol/cm <sup>3</sup> tissue |
| Tumor cells             | 39,500              | rec/tumor cell | $1.01 \times 10^1$    | pmol/cm <sup>3</sup> tissue |
| <b>NRP2</b>             |                     |                |                       |                             |
| Luminal EC (normal)     | 0                   | rec/EC         | 0                     | pmol/cm <sup>3</sup> tissue |
| Abluminal EC (normal)   | 0                   | rec/EC         | 0                     | pmol/cm <sup>3</sup> tissue |
| Luminal EC (diseased)   | 0                   | rec/EC         | 0                     | pmol/cm <sup>3</sup> tissue |
| Abluminal EC (diseased) | 0                   | rec/EC         | 0                     | pmol/cm <sup>3</sup> tissue |
| Myocytes                | 0                   | rec/myocyte    | 0                     | pmol/cm <sup>3</sup> tissue |
| Tumor cells             | 39,500 <sup>‡</sup> | rec/tumor cell | $1.02 \times 10^1$    | pmol/cm <sup>3</sup> tissue |

Receptor quantification from (17, 18). <sup>†</sup> Extrapolated from receptor density on normal ECs, accounting for different cell surface areas. <sup>‡</sup>No NRP2 quantification available; assumed to be the same as NRP1 on tumor cells. Conversions of receptor densities to tissue concentrations:

Abluminal EC receptors (normal):  $1.79 \times 10^{-5}$  (pmol/cm<sup>3</sup> tissue)/(rec/EC); Luminal EC receptors (normal):  $2.20 \times 10^{-4}$  (pmol/cm<sup>3</sup> tissue)/(rec/EC);

Abluminal EC receptors (diseased):  $1.74 \times 10^{-5}$  (pmol/cm<sup>3</sup> tissue)/(rec/EC); Luminal EC receptors (diseased):  $1.17 \times 10^{-7}$  (pmol/cm<sup>3</sup> tissue)/(rec/EC);

Myocyte receptors:  $5.96 \times 10^{-5}$  (pmol/cm<sup>3</sup> tissue)/(rec/myocyte); Myocyte receptor densities are expressed per myonuclear domain;

Tumor receptors:  $2.55 \times 10^{-4}$  (pmol/cm<sup>3</sup> tissue)/(rec/tumor cell)

**Table S5: Receptor and matrix binding site densities**

|                      | Measured parameter<br>Value | Model parameters  |                  | Unit                             |
|----------------------|-----------------------------|-------------------|------------------|----------------------------------|
|                      |                             | Value<br>(Normal) | Value<br>(Tumor) |                                  |
| Extracellular matrix | 0.75 $\mu\text{M}$          | 46                | 389              | $\text{pmol}/\text{cm}^3$ tissue |
| Microvessel BM       | 13 $\mu\text{M}$            | 1                 | 4                | $\text{pmol}/\text{cm}^3$ tissue |
| Parenchymal cell BM  | 13 $\mu\text{M}$            | 4                 | 32               | $\text{pmol}/\text{cm}^3$ tissue |

BM = basement membrane. VEGF binding sites in the ECM and BMs are based on those volumes:

Normal:  $6.2 \times 10^7$  ( $\text{pmol}/\text{cm}^3$  tissue)/M(ECM),  $8.7 \times 10^4$  ( $\text{pmol}/\text{cm}^3$  tissue)/M(EBM), and  $3.1 \times 10^5$  ( $\text{pmol}/\text{cm}^3$  tissue)/M(PBM).

Tumor:  $5.2 \times 10^8$  ( $\text{pmol}/\text{cm}^3$  tissue)/M(ECM),  $2.7 \times 10^5$  ( $\text{pmol}/\text{cm}^3$  tissue)/M(EBM), and  $2.4 \times 10^6$  ( $\text{pmol}/\text{cm}^3$  tissue)/M(PBM).

M = moles/liter interstitial space; for example, M(EBM) = moles/liter of endothelial basement membrane.

**Table S6: Transport parameters**

|                                                                | <b>Value</b>                           | <b>Reference</b> |
|----------------------------------------------------------------|----------------------------------------|------------------|
| <b>VEGF secretion rate</b>                                     |                                        |                  |
| Normal tissue (92:8 VEGF <sub>165</sub> :VEGF <sub>121</sub> ) | 0.751 molecules/cell/s                 | *                |
| Tumor (50:50 VEGF <sub>165</sub> :VEGF <sub>121</sub> )        | 0.562 molecules/cell/s                 | (17)             |
| <b>Lymph flow rate</b>                                         |                                        |                  |
|                                                                | 120 mL/h                               | (19)             |
| <b>Microvascular permeability</b>                              |                                        |                  |
| To VEGF in the normal tissue                                   | $4.00 \times 10^{-8}$ cm/s             | (8)              |
| To anti-VEGF & VEGF/anti-VEGF complex in the normal tissue     | $3.00 \times 10^{-8}$ cm/s             | (8)              |
| To VEGF in the tumor                                           | $4.00 \times 10^{-7}$ cm/s             | (8)              |
| To anti-VEGF & VEGF/anti-VEGF complex in the tumor             | $3.00 \times 10^{-7}$ cm/s             | (8)              |
| <b>Clearance</b>                                               |                                        |                  |
| VEGF                                                           | $0.0648 \text{ min}^{-1}$              | (20)             |
| Anti-VEGF & VEGF/anti-VEGF complex                             | $3.82 \times 10^{-7} \text{ min}^{-1}$ | (21)             |

\*Set to achieve ~4.5 pM free VEGF in blood, based on (22).

## V. References

1. Mac Gabhann F, Popel AS. Interactions of VEGF receptors and implications for signal transduction: a computational study. *Am J Physiol Heart Circ Physiol*. 2007;292:H459-74.
2. Chalmers JJ, Zborowski M, Moore L, Mandal S, Fang B, Sun L. Theoretical analysis of cell separation based on cell surface marker density. *Biotechnol Bioeng*. 1998;59(1):10-20.
3. Mac Gabhann F, Popel AS. Targeting neuropilin-1 to inhibit VEGF signaling in cancer: comparison of therapeutic approaches. *PLoS Comp Biol*. 2006;2(12):e180.
4. Less JR, Skalak TC, Sevick EM, Jain RK. Microvascular architecture in a mammary carcinoma: Branching patterns and vessel dimensions. *Cancer Res*. 1991;51:265-73.
5. Hernandez N, Torres SH, Finol HJ, Vera O. Capillary changes in skeletal muscle of patients with essential hypertension. *Anat Rec*. 1999;256(425-432).
6. Gavin TP, Robinson CB, Yeager RC, England JA, Nifong LW, Hickner RC. Angiogenic growth factor response to acute systemic exercise in human skeletal muscle. *J Appl Physiol*. 2003;96:19-24.
7. Magalhaes J, Ascensao A, Marques F, Soares JMC, Neuparth MJ, Ferreira R, et al. Skeletal muscle ultrastructural and plasma biochemical signs of endothelium dysfunction induced by a high-altitude expedition. *Basic Appl Myol*. 2005;15:29-35.
8. Stefanini MO, Wu FTH, Mac Gabhann F, Popel AS. A compartment model of VEGF distribution in blood, healthy and diseased tissues. *BMC Systems Biology*. 2008;2(1):77.
9. Kiens B, Roemen THM, van der Vusse GJ. Muscular long-chain fatty acid content during graded exercise in humans. *Am J Physiol Endocrinol Metabol*. 1999;276:E352-7.
10. Sjogaard G, Saltin B. Extra- and intracellular water spaces in muscles of man at rest and with dynamic exercise. *Am J Physiol Regul Integr Comp Physiol*. 1982;243:R271-80.
11. Wilson CBJH, Lammertsma AA, McKenzie Cg, Sikora K, Jones T. Measurements of blood flow and exchanging water space in breast tumors using positron emission tomography: A rapid and noninvasive dynamic method. *Cancer Res*. 1992;52:1592-7.
12. Paran Y, Bendel P, Margalit R, Degani H. Water diffusion in the different microenvironments of breast cancer. *NMR Biomed*. 2004;17(4):170-80.
13. Saltin B. Malleability of the system in overcoming limitations: functional elements. *J Exp Biol*. 1985;115:345-54.
14. Geretti E, Shimizu A, Kurschat P, Klagsbrun M. Site-directed mutagenesis in the B-neuropilin-2 domain selectively enhances its affinity to VEGF165, but not to semaphorin 3F. *J Biol Chem*. 2007;284(35):25698-707.
15. Gluzman-Poltorak Z, Cohen T, Herzog Y, Neufeld G. Neuropilin-2 and neuropilin-1 are receptors for the 165-amino acid form of vascular endothelial growth factor (VEGF) and of placenta growth factor-2, but only neuropilin-2 functions as a receptor for the 145-amino acid form of VEGF. *J Biol Chem*. 2000;275(24):18040-5.
16. Liang W-C, Wu X, Peale FV, Lee CV, Meng YG, Gutierrez J, et al. Cross-species vascular endothelial growth factor (VEGF)-blocking antibodies completely inhibit the growth of human tumor xenografts and measure the contribution of stromal VEGF. *J Biol Chem*. 2006;281:951-61.
17. Finley SD, Engel-Stefanini MO, Imoukhuede PI, Popel AS. Pharmacokinetics and pharmacodynamics of VEGF-neutralizing antibodies. *BMC Systems Biology*. 2011;5:193.

18. Imoukhuede PI, Popel AS. Quantification and cell-to-cell variation of vascular endothelial growth factor receptors. *Exp Cell Res.* 2011;317(7):955-65.
19. Guyton AC. The lymphatic system, interstitial fluid dynamics, edema, and pulmonary fluid. *Textbook of Medical Physiology*, 6th ed: W.B. Saunders Company; 1981.
20. Eppler S, Combs DL, Henry TD, Lopez JJ, Ellis SG, Yi J-H, et al. A target-mediated model to describe the pharmacokinetics and hemodynamic effects of recombinant human vascular endothelial growth factor in humans. *Clin Pharmacol Ther.* 2002;72:20-32.
21. Gordon MS, Margolin K, Talpaz M, Sledge GW, Jr., Holmgren E, Benjamin R, et al. Phase I safety and pharmacokinetic study of recombinant human anti-vascular endothelial growth factor in patients with advanced cancer. *J Clin Oncol.* 2001 Feb 1;19(3):843-50.
22. Kut C, Mac Gabhann F, Popel AS. Where is VEGF in the body? A meta-analysis of VEGF distribution in cancer. *Br J Cancer.* 2007;97(7):978-85.
