# Supplementary material
Source: PubMed Central journal article supplement (PMC3385824)
Supplement: 12248_2012_9363_MOESM3_ESM.pdf [file 12248_2012_9363_MOESM3_ESM.pdf]

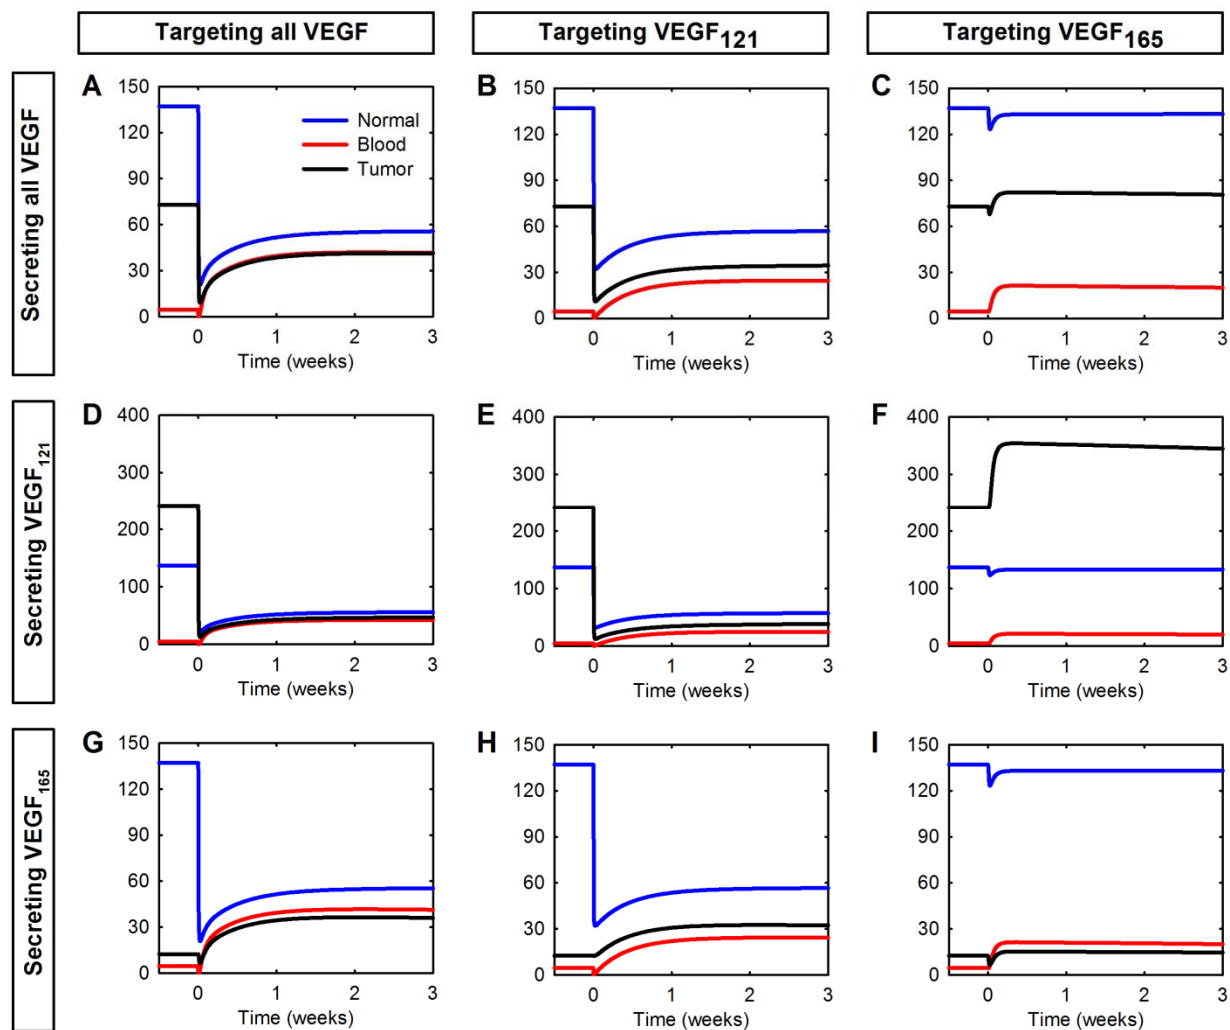

**Figure S1. Effect of targeting VEGF isoforms on free VEGF concentration in the body.** Free VEGF concentration profiles following a single intravenous injection anti-VEGF given at time 0 in tumors that preferentially secrete various VEGF isoform(s). Three cases were considered: **A-C**, Tumor secretes both VEGF isoforms. **D-F**, Tumor only secretes VEGF<sub>121</sub>. **G-I**, Tumor only secretes VEGF<sub>165</sub>. From left to right: Pan anti-VEGF targeting both VEGF isoforms, anti-VEGF<sub>121</sub> agent, and anti-VEGF<sub>165</sub> agent

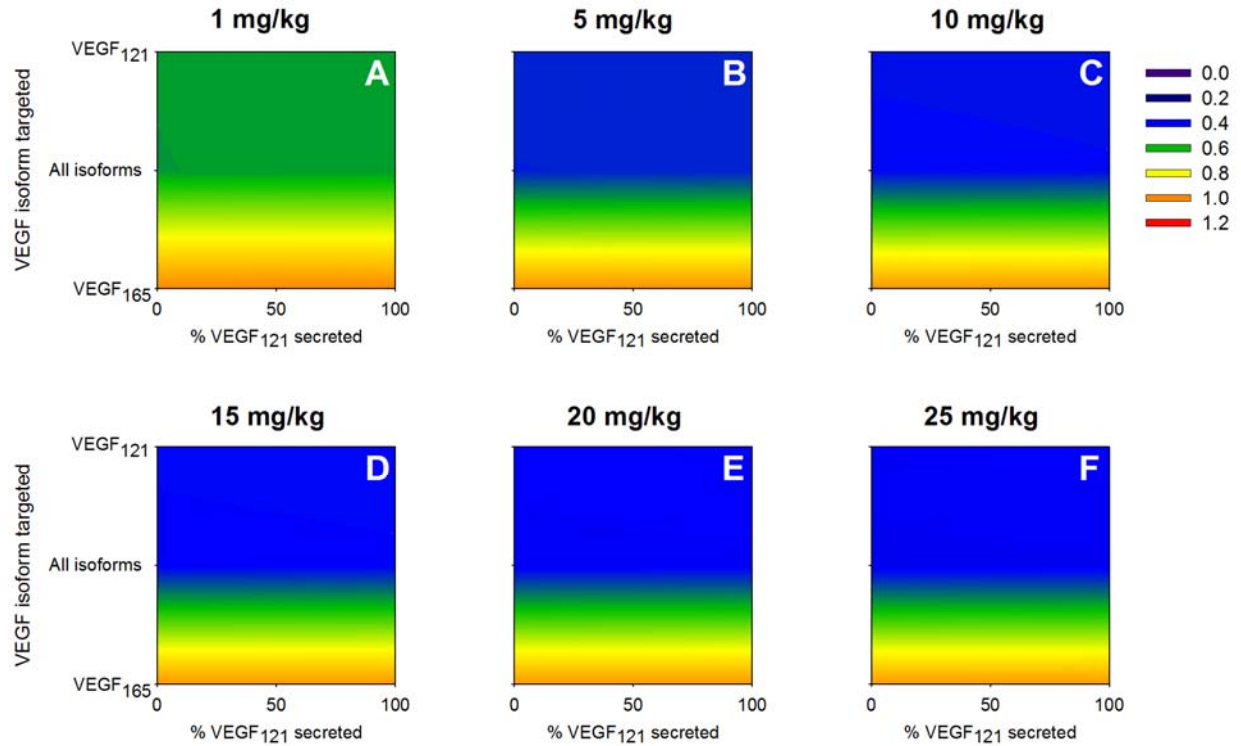

**Figure S2. Effect of anti-VEGF dosage on the fold-change in free VEGF in the normal tissue.** A single intravenous injection anti-VEGF given at time 0 in tumors that preferentially secrete various VEGF isoform(s). Three VEGF-neutralizing agents were examined: pan anti-VEGF, anti-VEGF<sub>121</sub>, and anti-VEGF<sub>165</sub>. The relative amount of VEGF<sub>121</sub> secreted by the tumor was varied from zero to 100%. The panels correspond to different dosages of the anti-VEGF agents: **A**, 1 mg/kg. **B**, 5 mg/kg. **C**, 10 mg/kg (base case). **D**, 15 mg/kg. **E**, 20 mg/kg. **F**, 25 mg/kg.

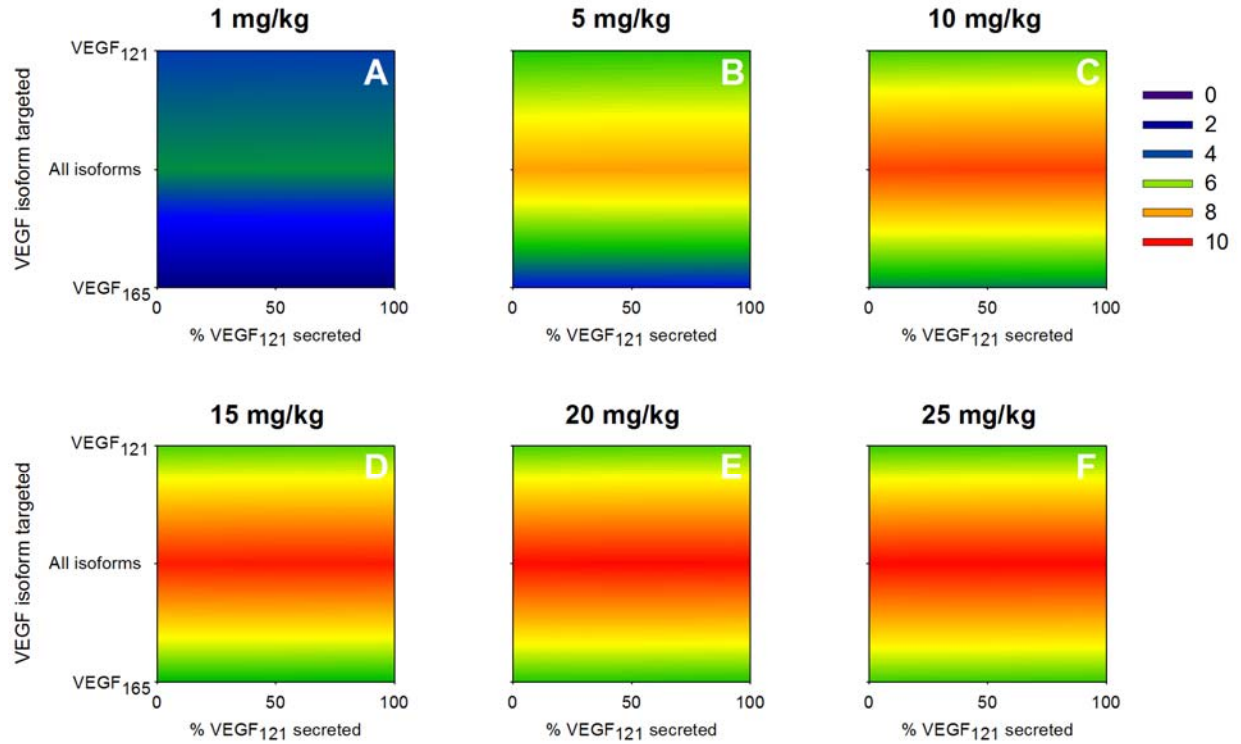

**Figure S3. Effect of anti-VEGF dosage on the fold-change in free VEGF in the blood.** A single intravenous injection anti-VEGF given at time 0 in tumors that preferentially secrete various VEGF isoform(s). Three VEGF-neutralizing agents were examined: pan anti-VEGF, anti-VEGF<sub>121</sub>, and anti-VEGF<sub>165</sub>. The relative amount of VEGF<sub>121</sub> secreted by the tumor was varied from zero to 100%. The panels correspond to different dosages of the anti-VEGF agents: **A**, 1 mg/kg. **B**, 5 mg/kg. **C**, 10 mg/kg (base case). **D**, 15 mg/kg. **E**, 20 mg/kg. **F**, 25 mg/kg.

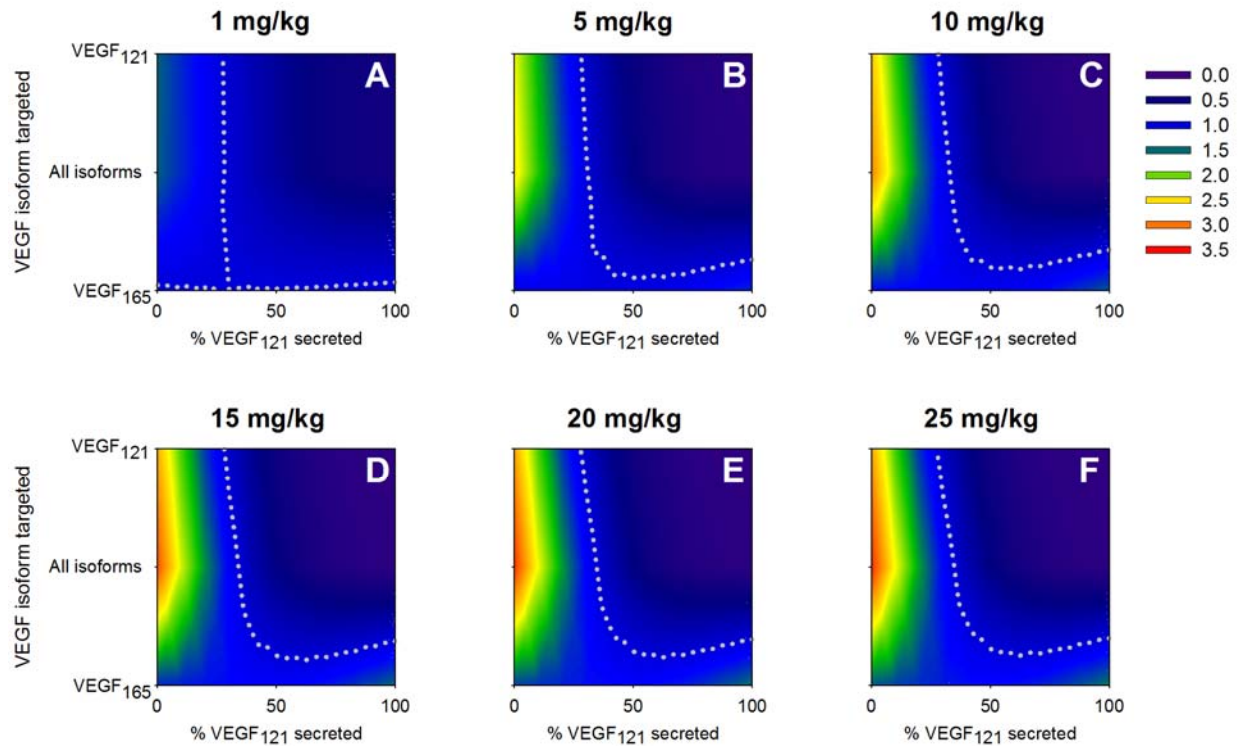

**Effect of anti-VEGF dosage on the fold-change in tumor free VEGF.** A single intravenous injection anti-VEGF given at time 0 in tumors that preferentially secrete various VEGF isoform(s). Three VEGF-neutralizing agents were examined: pan anti-VEGF, anti-VEGF<sub>121</sub>, and anti-VEGF<sub>165</sub>. The relative amount of VEGF<sub>121</sub> secreted by the tumor was varied from zero to 100%. The panels correspond to different dosages of the anti-VEGF agents. **A**, 1 mg/kg. **B**, 5 mg/kg. **C**, 10 mg/kg (base case). **D**, 15 mg/kg. **E**, 20 mg/kg. **F**, 25 mg/kg. The gray dotted line in each panel is the isocline for a fold-change of 1.
